# Supplementary figures and images for: Systemic high-dose dexamethasone treatment may modulate the efficacy of intratumoral viral oncolytic immunotherapy in glioblastoma models
Source: HighWire-hosted journal article supplement (doi:10.1136/jitc-2021-003368), 2022-01-01

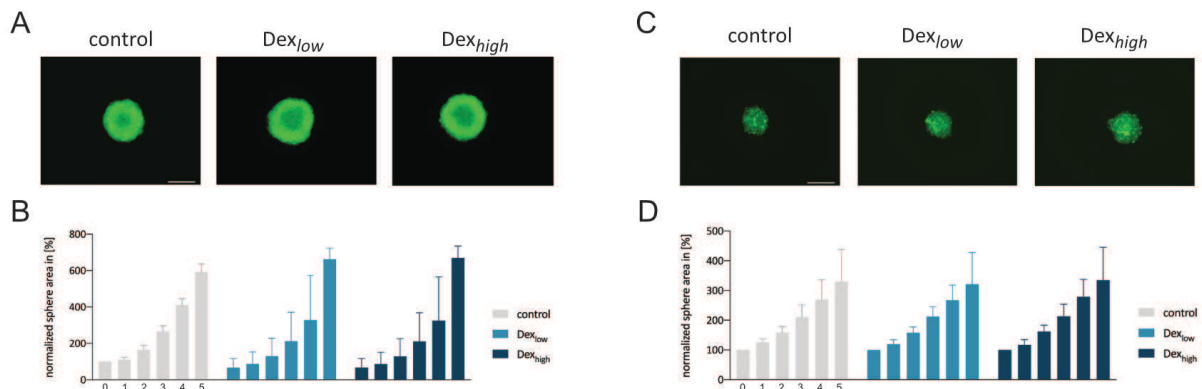

Supplement: jitc-2021-003368supp002_data_supplement.pdf [file jitc-2021-003368supp002_data_supplement.pdf]

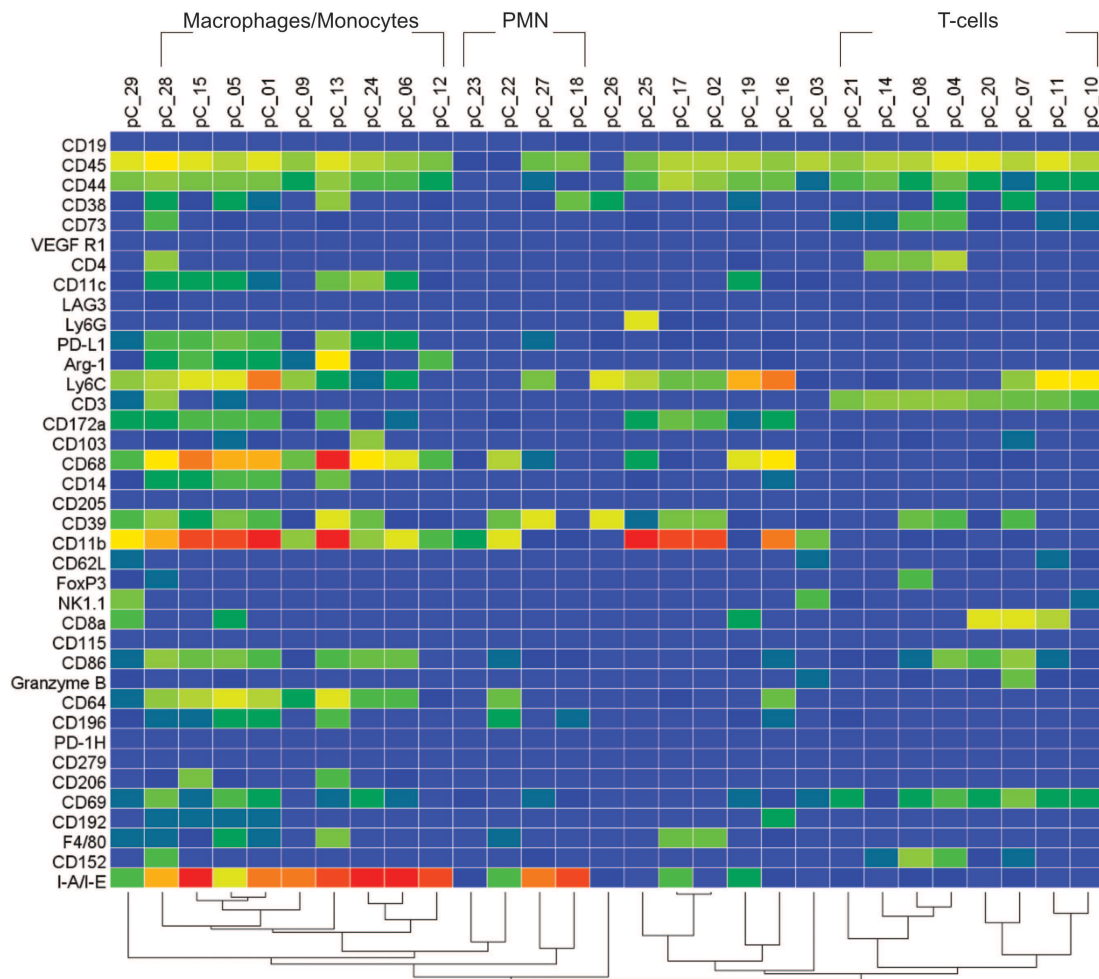

Supplement: jitc-2021-003368supp004_data_supplement.pdf [file jitc-2021-003368supp004_data_supplement.pdf]
